# Supplementary material
Source: PubMed Central journal article supplement (PMC3133159)
Supplement: supp_193_10_2408__1.pdf [file supp_193_10_2408__1.pdf]

Supplemental Figure S1 (Mlynek *et al.*)

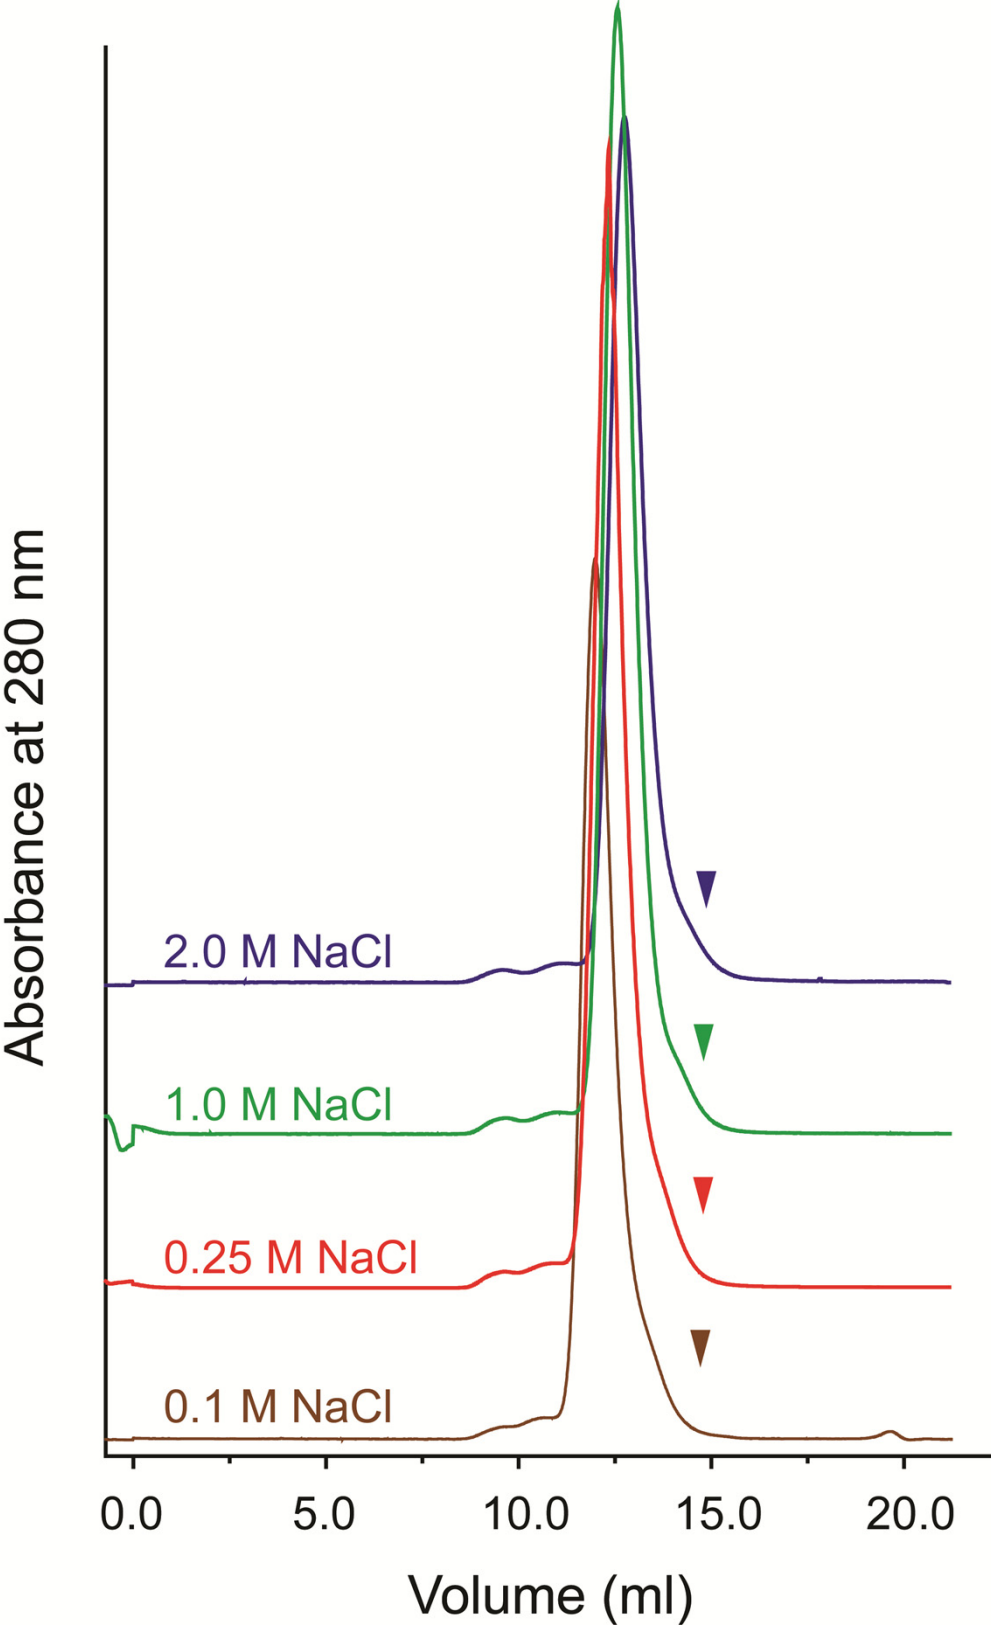

**Supplemental Figure S1** Stability of the NwCld dimer at different salt concentrations. The curves depict the absorbance (280 nm) trace of NwCld eluting from a Superdex 75 10/300 column at different salt concentrations. Arrowheads indicate the expected elution volume of an NwCld monomer. This elution volume was calculated based on the column calibration at the respective salt concentration.

Supplemental Figure S2 (Mlynek *et al.*)

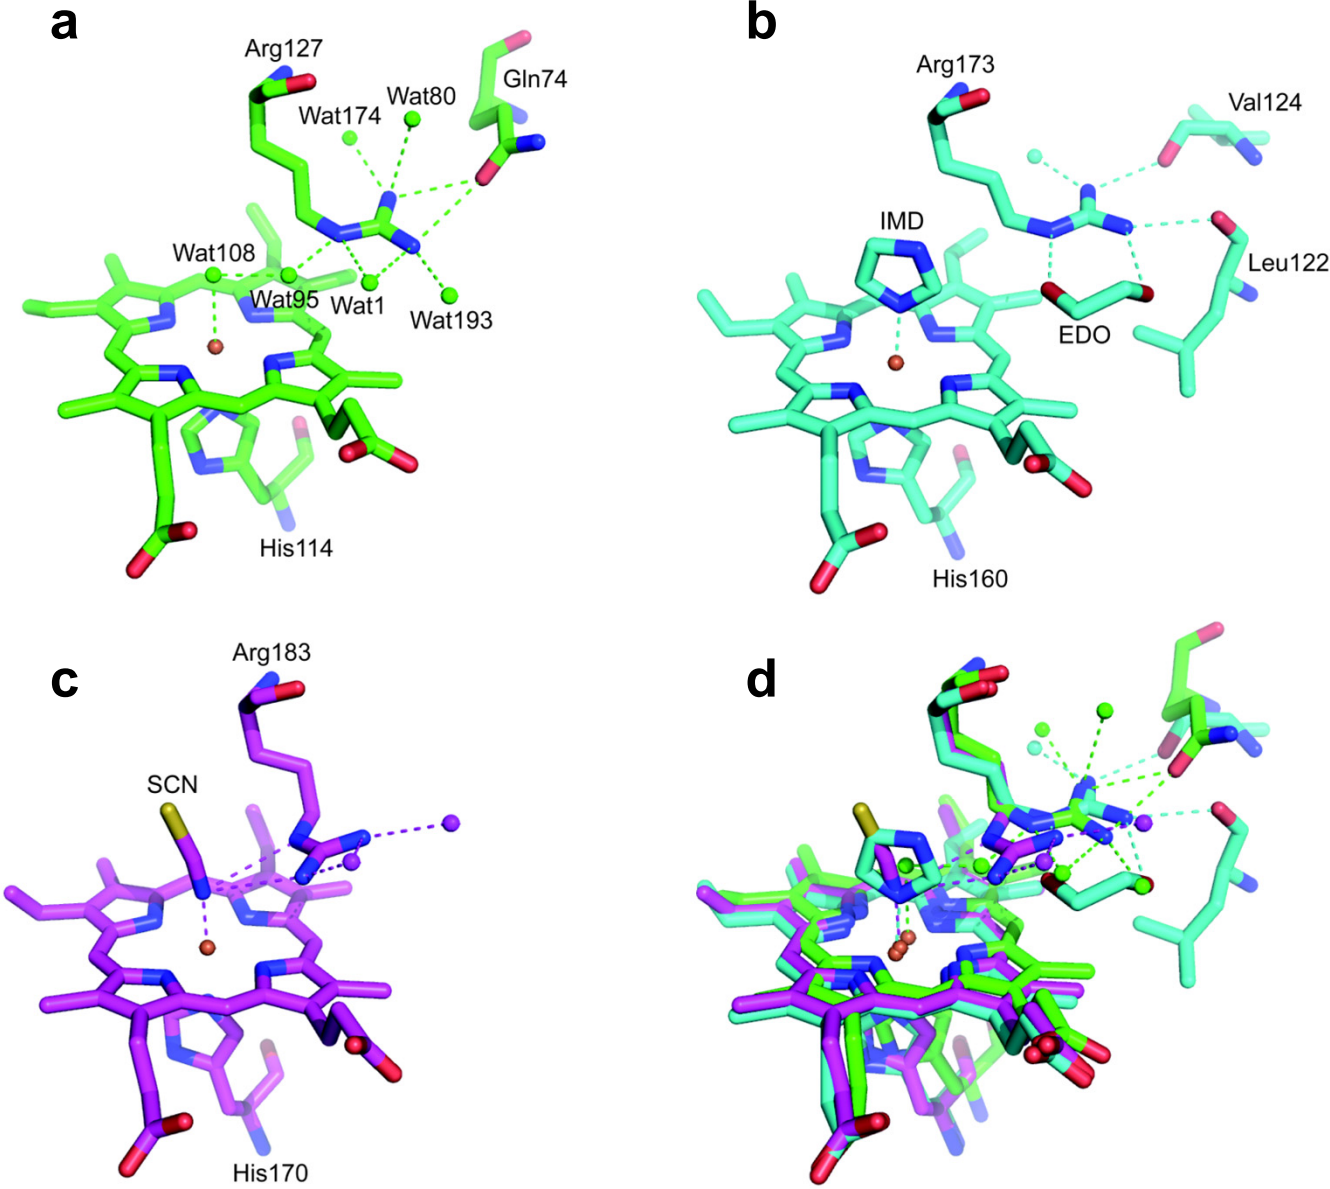

**Supplemental Figure S2** Environment of the catalytically important arginine residue as found in the structures of **(a)** dimeric NwCld, **(b)** pentameric NdCld, and **(c)** hexameric AoCld. The NwCld structure represents the enzyme in its native state, as a water molecule (Wat108) was found to coordinate with the heme iron (panel a). Instead of water, imidazole (IMD) and thiocyanate (SCN) are bound to the heme iron of NdCld (panel b) and AoCld (panel c), respectively. In the case of NdCld, water molecules that stabilize the arginine residue in the native enzyme were replaced by ethylene glycol (EDO) from the cryo solution. Carbon atoms are depicted in green, cyan, and magenta. Oxygen and nitrogen atoms are shown in red and blue, respectively. Water molecules are shown as spheres in green (panel a), cyan (panel b), and magenta (panel c). Heme irons are shown as orange spheres. **(d)** Overlay of the three structures.

Supplemental Figure S3 (Mlynek *et al.*)

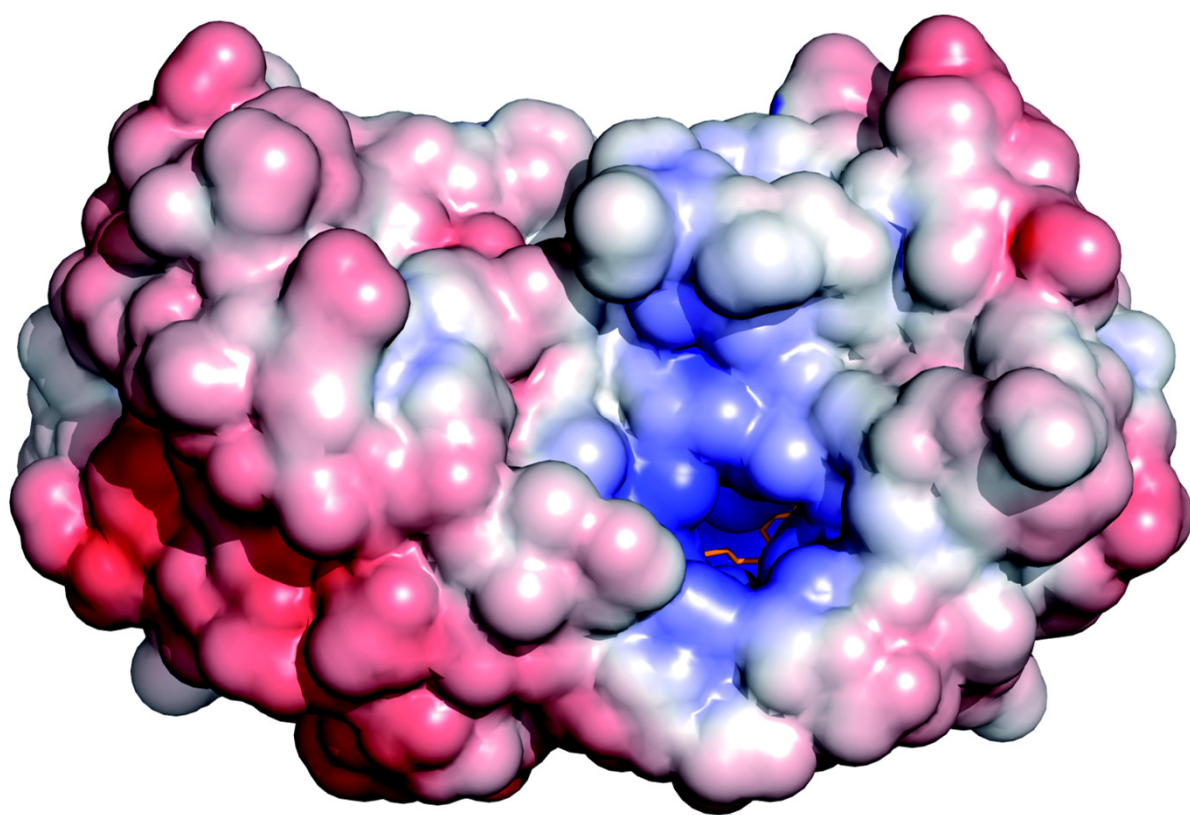

**Supplemental Figure S3** Electrostatic surface representation of the NwCld holoenzyme. The solvent-accessible surface of the NwCld dimer is colored according to its electrostatic potential (blue for positive, red for negative). Hemes are presented as orange stick models. The orientation of the structure is the same as in Fig. 4a in the main text.

Supplemental Figure S4 (Mlynek *et al.*)

**a**

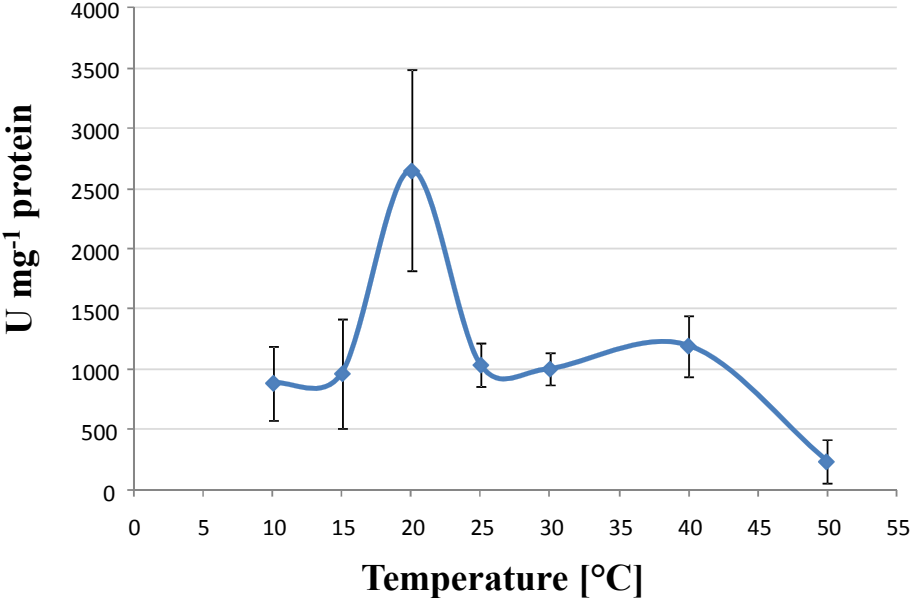

**b**

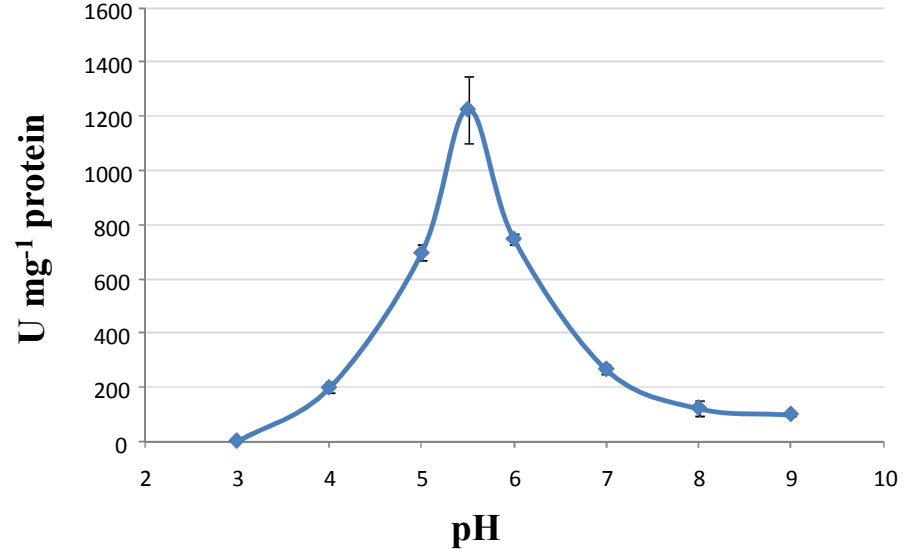

**Supplemental Figure S4** Specific activities of NwCld at different temperatures (a) or pH values (b). Experiments were carried out with starting substrate concentrations of 1 mM NaClO<sub>2</sub>. One unit (U) is defined as the amount of Cl<sup>-</sup> produced per minute (μmol/min). Data points represent mean values from triplicate experiments. Error bars depict standard deviations.



# Supplemental Figure S5 (Mlyncz et al.)

|                                         |     |                                                                                                   |                                                         |     |
|-----------------------------------------|-----|---------------------------------------------------------------------------------------------------|---------------------------------------------------------|-----|
| <b>Nitrobacter winogradskyi</b>         | 3   | -----FTVFTGGDS-----                                                                               | -----G-AWSI--LSVAPVIGESLMAASHLAIAPSLSLGDSAT--           | 47  |
| <i>Nitrobacter</i> sp. Nb-311A          | 3   | -----FTTFTGGDT-----                                                                               | -----G-AWNI--LSMASVIGDLSMPASHLAIAPASASLGDAV--           | 46  |
| <i>Bradyrhizobium japonicum</i>         | 2   | -----FRTRFGGHS-----                                                                               | -----G-GWRI--TSISPVTGDELPMPFASVTDSEAVSLPLVPSR           | 48  |
| <i>Limnobacter</i> sp. MED105           | 4   | -----HYSFTGGQE-----                                                                               | -----G-QWRV--TRCDTVVGAIEAVPRLMVNT--AASQLSQR--           | 47  |
| <i>Pseudomonas aeruginosa</i>           | 4   | -----HYSFTGGSE-----                                                                               | -----G-SWRV--TSCETLIGLPLEIVERVMVNM--PSTNLIER--          | 47  |
| <i>Gloeobacter violaceus</i>            | 4   | -----RYSFLGGKR-----                                                                               | -----G-PWRV--ARLDGLRAGLAEVERLQIVQG--EWASASE--           | 47  |
| <i>Cyanothecae</i> sp. PCC 7425         | 14  | -----RYSFTGGRT-----                                                                               | -----G-QWQV--VKIRNVLGPGQLVKEVNLING--AVAEIPLD--          | 57  |
| <i>Nitrococcus mobilis</i>              | 5   | -----LFAFVGGEI-----                                                                               | -----G-SWRV--IETKTVAGEGLAEVKRLNVVA--AVPLLPDD--          | 48  |
| <i>Pseudomonas stutzeri</i>             | 3   | -----LFTFAGGET-----                                                                               | -----AVAGAPLPGIPRLNVAAG--SVSPQPPG--                     | 28  |
| <i>Klebsiella pneumoniae</i>            | 5   | -----LFTFAGGET-----                                                                               | -----G-VWRV--VRMDAVAGAPLPGIPRLDVAAG--SVSPQPLG--         | 48  |
| <i>Cupriavidus metallidurans</i>        | 5   | -----LFAFVGADI-----                                                                               | -----G-PWRI--VRAETRVGEPLPEAKRLNVVA--SELQSETN--          | 48  |
| <i>Ralstonia pickettii</i>              | 5   | -----LFAFVGADI-----                                                                               | -----G-PWRI--VRAETRVGEPLPEAKRLNVVA--SELQSETN--          | 48  |
| plasmid pAKD4                           | 0   | .....                                                                                             | .....                                                   | 0   |
| <i>Janthinobacterium</i> sp. Marseille  | 5   | -----LFGFVGGDS-----                                                                               | -----G-AWEV--TQMRVAVGAPLPEVKTIAIINGFSIQGHHAH--          | 49  |
| <i>Sorangium cellulosum</i>             | 7   | -----RVSFVAGSA-----                                                                               | -----G-AWRV--ERTVLRVGEELPAAPRLQVREGGSFVAPPEA--          | 51  |
| <b>Ca. Nitrospira defluvi</b>           | 1   | .ADREKLLTESGVYGFATFQMDHWDWLLPAGESRVIS----                                                         | VAEVKGLVEQWGSKILVSYLLRGLSD-----HADLMFRVHARTLSDTQOFLS    | 84  |
| <b>Azospira oryzae</b>                  | 11  | KIERGTLLTQPGVFGVFTMFKLRPDMWNVKPMERKGA----                                                         | AEEVKKLEKHKDNVLDVLYLTRGLET-----NSDFFFRINAYDLAKAQTFMR    | 95  |
| <b>Dechloromonas aromatica</b>          | 42  | KIERGTLLTQPGVFGVFTMFKLRPDMWNVKPMERKGA----                                                         | AEEVKKLEKHKDNVLDVLYLTRGLET-----NSDFFFRINAYDLAKAQTFMR    | 126 |
| <i>Dechlorosoma</i> sp. KJ              | 42  | KIERGTLLTQPGVFGVFTMFKLRPDMWNVKPMERKGA----                                                         | AEEVKKLEKHKDNVLDVLYLTRGLET-----NSDFFFRINAYDLAKAQTFMR    | 126 |
| <i>Dechloromonas chlorophilus</i>       | 1   | .....                                                                                             | .....                                                   | 44  |
| <i>Pseudomonas chloritidismutans</i>    | 1   | .....                                                                                             | .....                                                   | 33  |
| <i>Pseudomonas</i> sp. PK               | 1   | .....                                                                                             | .....                                                   | 44  |
| <i>Dechloromonas agitata</i>            | 40  | KI-----LTPAGVGFNGFSTYKVRPDIYKLSMAERKGA----                                                        | AAEVVAVVEKYKDKVKAEEAYLTRGFEEA-----NSDFFFRINAYDLAKAQTFMR | 119 |
| <i>Dechloromonas</i> sp. LT-1           | 5   | .....                                                                                             | .....                                                   | 44  |
| <i>Ideonella dechloratans</i>           | 48  | KI-----LSPAGVGFVAFSTYKIRPDIYKVALAERKGA----                                                        | ADEVMAVLEKHKVVDAYLTRGFEEA-----KSDYFLRVHAYDAVAQAFLV      | 127 |
| <i>Dechlorospirillum</i> sp. WD         | 6   | .....                                                                                             | .....                                                   | 44  |
| <i>Magnetospirillum magnetotacticum</i> | 51  | KL-----LTPAGVGFNGFSTYKLRSDIYKLSAAERKGA----                                                        | AAEVMAVVEKHKANIADAYLTRGFEEA-----QSDYFLRVHSDMMAAQAFLV    | 130 |
| <b>Geobacillus stearothermophilus</b>   | 6   | -----QTLDGWYCLHDFRTIDWSAWKTLPNREERAAISEFLALVDQWETTESKQGSNAVITYI--VQG-----                         | KADILFMI LRPTLDELHEIT                                   | 87  |
| <i>Listeria monocytogenes</i>           | 6   | -----KTLDGWFLHDFRSIDWAARELNPNQBELMNLNLSHFLSDBEITKNIGEGHTIYI--LGO-----                             | KADLVFTLRDLSLEALEVEN                                    | 87  |
| <i>Staphylococcus aureus</i>            | 6   | -----ETLDGWYSLHLFYAVDWSALRIVPKDERDALVTEFQSFLENTATVRSKSGDQAIYNI--TGO-----                          | KADLLLWLFRPEMKSLNHEN                                    | 87  |
| <b>Thermus thermophilus</b>             | 3   | RHVPEPTHLEGWHLVHDFRLLDFARFWSAPLEAREDAWEEELKGLVREWRELEEAGQSGYGIYQV--VGH-----                       | KADLLFLNLRPLGLDPLLEAEA                                  | 91  |
| <b>Thermoplasma acidophilum</b>         | 2   | -----TEIYTSVLRSYRLLECKGYSADATRSLLDR---MMRSIDFFSAPNGYINFHIIYRS--YRT-----                           | DSVDVFWYSRNPDLMLLAKE                                    | 76  |
| <i>Sulfolobus acidocaldarius</i>        | 2   | -----ANGVYMYVIAQFNNEWWSLSTQTRRNI---LNRIELEARSKNDLVALKRFIS--LRY-----                               | DGHLLYWVSDFTSKLNNLRY                                    | 76  |
| <b>Nitrobacter winogradskyi</b>         | 48  | -----TPWQLRGVASHARYVERAE---KIALT---SVQAGLGRNEATRAALPIRISA---AWEMTQDERRAIFEDKSHIAASLKY             | P-123                                                   |     |
| <i>Nitrobacter</i> sp. Nb-311A          | 47  | -----TPWRLRGVTSHLRYVERAE---KIALT---EVQAGLGRAEATRAALPIRISA---AWEMTQDERRVVFEDKSHIAASLKY             | P-122                                                   |     |
| <i>Bradyrhizobium japonicum</i>         | 49  | -----NAWRLAGVPSLSRYTERAE---KQQLV---AVQAGLGRLEATSAALPIRISQ---AWMLTQDERRRIFEDRSHIAASLRF             | P-124                                                   |     |
| <i>Limnobacter</i> sp. MED105           | 48  | -----GTWMLQGTSTNVRYAERHE---INQLR---AKQELSRPASTCAALPIKINA---QWALSQDERRAIFEAQSHIETIGLAY             | P-123                                                   |     |
| <i>Pseudomonas aeruginosa</i>           | 48  | -----GTWVLOGFTSNVRYAERHE---INQLR---AKQELNRPSTSCAALPIKISP---BWAMSQDERRRIFEAQSHIETIGLAY             | P-123                                                   |     |
| <i>Gloeobacter violaceus</i>            | 48  | -----AAWVLRGLTSTNVRYATRE---VDALR---ERQPALARPEARCAALPIKISA---RWELAQDERRAIFEESSHITAIEMFEY           | P-123                                                   |     |
| <i>Cyanothecae</i> sp. PCC 7425         | 58  | -----SAWRLQGFASNIYAIRTE---LEALQ---AVQPMNRAEAILAVLPIKISA---QWEMAQDERRRIFERESEHITAVGLEYP            | P-133                                                   |     |
| <i>Nitrococcus mobilis</i>              | 49  | -----AQWLLRGVTSNRYVRESE---KDRLV---AKQPVLGRQATCAAFPIRITA---SWNLAQDERRMILEESSEHITGLKLY              | P-124                                                   |     |
| <i>Pseudomonas stutzeri</i>             | 29  | -----TKWLLRGVTSNRYVRESE---KDRLV---AKQPSLGRAEATCAALPIRNP---SWGLAQDERRKIFEEQSRHITGLQY               | P-104                                                   |     |
| <i>Klebsiella pneumoniae</i>            | 49  | -----TKWLLRGVTSNRYVRESE---KDRLV---AKQPSLGRAEATCAALPIRNP---SWGLAQDERRKIFEEQSRHITGLQY               | P-124                                                   |     |
| <i>Cupriavidus metallidurans</i>        | 49  | -----APWLLRGVTSNRYVMRAE---KNEIV---AKQGLARPEATCGALPIRINA---AWMLTQDERRSVFE--QSKVQIGLQY              | P-123                                                   |     |
| <i>Ralstonia pickettii</i>              | 49  | -----APWLLRGVTSNRYVMRAE---KNEIV---AKQGLARPEATCGALPIRINA---AWMLTQDERRSVFE--QSKVQIGLQY              | P-123                                                   |     |
| plasmid pAKD4                           | 1   | .....                                                                                             | .....                                                   | 60  |
| <i>Janthinobacterium</i> sp. Marseille  | 50  | -----WVLRGVTSNRYVTEKEE---KSRLL---ATQEGLRGTESTLAALPIRINA---SWMLTQDERRRILEESHITQIGMAY               | P-123                                                   |     |
| <i>Sorangium cellulosum</i>             | 52  | -----TWVLLGGVRSNRYVTELEE---RRRLV---AVQEDLGRASSTQAALPIRISA---AWMLAQDERRRIFEARSHIETIGLEY            | P-126                                                   |     |
| <b>Ca. Nitrospira defluvi</b>           | 85  | AFMGRTRGRLHLSGGLLHGVSKNPTYVAGFP---ESMKT---ELQVNGESGRPYAIVPIKIDA---DWALDQEARLMO---EETQALPYK        | X-169                                                   |     |
| <b>Azospira oryzae</b>                  | 96  | EFRSTTIGKNADVFTLVGVTKPLNYISKDK---SPGLNA---GLSSATYSGPAPRYVIVPVKNA---EWNMSPEERLKEME---VETPTPLAY     | V-182                                                   |     |
| <b>Dechloromonas aromatica</b>          | 127 | EFRSTTIGKNADVFTLVGVTKPLNYISKDK---SPGLNA---GLSSATYSGPAPRYVIVPVKNA---EWNMSPEERLKEME---VETPTPLAY     | V-213                                                   |     |
| <i>Dechloromonas chlorophilus</i>       | 45  | EFRSTTIGKNADVFTLVGVTKPLNYISKDK---SPGLNA---GLSSATYSGPAPRYVIVPVKNA---EWNMSPEERLKEME---VETPTPLAY     | A-131                                                   |     |
| <i>Pseudomonas chloritidismutans</i>    | 34  | EFRSTTIGKNADVFTLVGVTKPLNYISKDK---SPGLNA---GLSSATYSGPAPRYVIVPVKNA---EWNMSPEERLKEME---VETPTPLAY     | V-120                                                   |     |
| <i>Pseudomonas</i> sp. PK               | 45  | EFRSTTIGKNADVFTLVGVTKPLNYISKDK---SPGLNA---GLSSATYSGPAPRYVIVPVKNA---EWNMSPEERLKEME---VETPTPLAY     | V-131                                                   |     |
| <i>Dechloromonas agitata</i>            | 120 | DFRATRFGMNAEVTENLVGTMKDLNYITDKD---SPNLNA---GLTGATYRDATPRYAFVIVPVKNA---DWNMLTDEQRKEME---DETLPTLAN  | V-206                                                   |     |
| <i>Dechloromonas</i> sp. LT-1           | 45  | DFRATRFGMYSDVTEQLGTMKDLNYITKEK---SPDLNA---GLSSATYSAEAPPYAFVIVPVKNA---DWNMLTDAQRLKEME---DETLPTLGN  | V-131                                                   |     |
| <i>Ideonella dechloratans</i>           | 128 | DFRATRFGMYSDVTEQLGTMKDLNYITKEK---SPDLNK---GLSGATYADAPRFAFVIVPVKNA---DWNMLTDAQRLKEME---DETLPTLFF   | V-214                                                   |     |
| <i>Dechlorospirillum</i> sp. WD         | 45  | DWRATKLMGYSDVTEENLVGITKALNYISKDK---SPGLNA---GLSSATYSDSAPRYVIVPVKNA---EWNMSPEERLKEIE---VETHTGLQY   | V-131                                                   |     |
| <i>Magnetospirillum magnetotacticum</i> | 131 | DFRATRFGMYSDVTEENLVGITKALNYISKDK---SPDLNS---GLSSATYGDAPRYAIVPVKNA---EWNMSPEERLKEME---VETHTGLQY    | V-217                                                   |     |
| <b>Geobacillus stearothermophilus</b>   | 88  | ALNKTKLADYLLPAYSYVSVVLSNYLSAGS---EDPYQIPEVRRRLYPLPKNTYICFYPMDRRQGDNNMYLMSQORRELMR---AGMTRGRYAG-   | 180                                                     |     |
| <i>Listeria monocytogenes</i>           | 88  | RFNKLAIADYLLPTYSYISVVELSNYLSHAGGDDPYQNGKVRARLYPALPKKHICFYPMNRRQGDADNNMYLMPERQQLIR---DGLIGRSYAG-   | 183                                                     |     |
| <i>Staphylococcus aureus</i>            | 88  | EFNKLRIADYLLPTYSYVSVVLSNYLSAGS---EDPYENPHIKARLYPELPHSDYICFYPMNRRNRYNNMYLMTMERQKLMY---DGLMTRGRYAG- | 181                                                     |     |
| <b>Thermus thermophilus</b>             | 92  | RLRSARAFARYLGRSFSYVSVVLSGQEKPLD---PESPY---VKPRLTPRVKSGYVCFYPMNRRQGDNNMYLMPAKERASLMK---AGMTRGRYAG- | 181                                                     |     |
| <b>Thermoplasma acidophilum</b>         | 77  | R-VQASMRPIAVSSFSISYDESYPNANK---KL-----EDSLRLPLRYFVAYPMSRTP---DWWLLDFDTRKEIMH---EIKMALNHDE         | 156                                                     |     |
| <i>Sulfolobus acidocaldarius</i>        | 77  | S-LISSGEGFLEKLTLPFSYKPSYVGGSD---KL-----ASYLREPLRYFIAYPMKRSRTP---DWWLLDFEERKEIMH---EIKMALNHPDN     | 157                                                     |     |
| <b>Nitrobacter winogradskyi</b>         | 124 | -AIARQLYHCRDLG---EPPDFLTFWFEYAPEHATMFEDLVGLVLRATEWTY--VEREVDIRLAR-AI.....                         | 183                                                     |     |
| <i>Nitrobacter</i> sp. Nb-311A          | 123 | -AIARQLYHCRDLG---EPPDFLTFWFEYAPEHATMFEDLVGLVLRATEWTY--VEREVDIRLAR-AV.....                         | 182                                                     |     |
| <i>Bradyrhizobium japonicum</i>         | 125 | -AIARQLYHCRDLG---EPPDFLTFWFEYAPEHATMFEDLVGLVLRATEWTY--VEREVDVVRVK-EVLSA.....                      | 187                                                     |     |
| <i>Limnobacter</i> sp. MED105           | 124 | -EIAARQLHHSRDLG---EPPDFLTFWFEYAPEHATDAFDELVLKLRTESEWKY--VEREVDIRLVK-DSL.....                      | 184                                                     |     |
| <i>Pseudomonas aeruginosa</i>           | 124 | -EIAARQLHHSRDLG---EPPDFLTFWFEYAPEHATFANFKLQAQLRSSKWEY--VEREVDIRLVK-NV.....                        | 183                                                     |     |
| <i>Gloeobacter violaceus</i>            | 124 | -EIAARQLHHSRDLG---EPPDFLTFWFEYAPEHATFADLDRLRVTRWDF--VEREVDIRLEH-IDARI.....                        | 186                                                     |     |
| <i>Cyanothecae</i> sp. PCC 7425         | 134 | -GVARRLHCRDLG---EPPDFLTFWFEYAPEHATFANFKLQAQLRSSKWEY--VEREVEWMLK-L.....                            | 192                                                     |     |
| <i>Nitrococcus mobilis</i>              | 125 | -AVARRLHCRDLG---EPPDFLTFWFEYAPSDSAFDELVAELRASQWTY--VDREIDMLRLAR-DE.....                           | 187                                                     |     |
| <i>Pseudomonas stutzeri</i>             | 105 | -AVARRLHCRDLG---EPPDFLTFWFEYAPSDSAFDELVAELRASQWTY--VDREIDMLRLAR-DE.....                           | 187                                                     |     |
| <i>Klebsiella pneumoniae</i>            | 125 | -AVARRLHCRDLG---EPPDFLTFWFEYAPSDSAFDELVAELRASQWTY--VDREIDMLRLAR-DE.....                           | 187                                                     |     |
| <i>Cupriavidus metallidurans</i>        | 124 | -AVARRLHCRDLG---EPPDFLTFWFEYAPSDSAFDELVAELRASQWTY--VDREIDMLRLAR-DE.....                           | 186                                                     |     |
| <i>Ralstonia pickettii</i>              | 124 | -AVARRLHCRDLG---EPPDFLTFWFEYAPSDSAFDELVAELRASQWTY--VDREIDMLRLAR-DE.....                           | 186                                                     |     |
| plasmid pAKD4                           | 61  | -AVARRLHCRDLG---EPPDFLTFWFEYAPSDSAFDELVAELRASQWTY--VDREIDMLRLAR-DE.....                           | 123                                                     |     |
| <i>Janthinobacterium</i> sp. Marseille  | 124 | -AIARQLYHCRDLG---EPPDFLTFWFEYAPSDSAFDELVAELRASQWTY--VDREIDMLRLAR-DE.....                          | 186                                                     |     |
| <i>Sorangium cellulosum</i>             | 127 | -AVARRLHCRDLG---EPPDFLTFWFEYAPSDSAFDELVAELRASQWTY--VDREIDMLRLAR-DE.....                           | 185                                                     |     |
| <b>Ca. Nitrospira defluvi</b>           | 170 | -TVKRKLYHST-GL---DDDFITFYFETE---RLEDFNHNLVRAQLQVQKFRHNRRFGHPTLLGTM-SPLDEILEKFAQ                   | 238                                                     |     |
| <b>Azospira oryzae</b>                  | 183 | -NVKRKLYHST-GL---DDDFITFYFETE---DLTAFNNLMLSLAQVKNKHFVRWGSPTTLGTI-HSPEDVIKALAD                     | 251                                                     |     |
| <b>Dechloromonas aromatica</b>          | 214 | -NVKRKLYHST-GL---DDDFITFYFETE---DLTAFNNLMLSLAQVKNKHFVRWGSPTTLGTI-HSPEDVIKALAD                     | 282                                                     |     |
| <i>Dechlorosoma</i> sp. KJ              | 214 | -NVKRKLYHST-GL---DDDFITFYFETE---DLTAFNNLMLSLAQVKNKHFVRWGSPTTLGTI-HSPEDVIKALAD                     | 282                                                     |     |
| <i>Dechloromonas chlorophilus</i>       | 132 | -NVKRKLYHST-GL---DDT.....                                                                         | 146                                                     |     |
| <i>Pseudomonas chloritidismutans</i>    | 121 | -NV.....                                                                                          | 122                                                     |     |
| <i>Pseudomonas</i> sp. PK               | 132 | -NVKRKLYHST-GL---DDT.....                                                                         | 146                                                     |     |
| <i>Dechloromonas agitata</i>            | 207 | -NVKRKLYHST-GL---DDDFITFYFETA---DLGAFNNLMLLAKVPEKNYHVRWGSPTTLGTI-QSFDVSVNLTSM                     | 275                                                     |     |
| <i>Dechloromonas</i> sp. LT-1           | 132 | -NVKRKLYHST-GL---DDT.....                                                                         | 146                                                     |     |
| <i>Ideonella dechloratans</i>           | 215 | -NVKRKLYHST-GL---DDDFITFYFETN---DLGAFNNLMLLAKVPEKNYHVRWGNPTVLGTI-QPIENLVKLTSM                     | 283                                                     |     |
| <i>Dechlorospirillum</i> sp. WD         | 132 | -NVKRKLYHST-GL---DDA.....                                                                         | 146                                                     |     |
| <i>Magnetospirillum magnetotacticum</i> | 218 | -NVKRKLYHST-GL---DDDFITFYFETN---DLGAFNNLMLLAKVPEKNYHVRWGSPTVLGTI-QTFETVVKLTSM                     | 286                                                     |     |
| <b>Geobacillus stearothermophilus</b>   | 181 | -KVTQITGVS-GL---DDFEGWVTLFSD---DALQFKKLVEMRFEVDSAR-FGEFGSFFVGTRLPMENVSFFHVH.                      | 248                                                     |     |
| <i>Listeria monocytogenes</i>           | 184 | -KVQQITGSI-GF---DDVEGVTFLSD---DALEFKRIVTEMRFEDEASAR-YAEFGSFFIGNLLSEQLSKLFTI.                      | 251                                                     |     |
| <i>Staphylococcus aureus</i>            | 182 | -EKIQPTIGVS-GF---DDVEGVTFLSD---DVLQFKKIVYEMRFEVDSAR-YGFEFGSFFVGHLLINTNEFDQFFAIT.                  | 250                                                     |     |
| <b>Thermus thermophilus</b>             | 182 | -EVMQVIGSAQ-GL---DDWEGWDLFSE---DPVQFKKIVYEMRFEVDSAR-YGFEFGSFFVGVKY-LDEAIARAFGL                    | 249                                                     |     |
| <b>Thermoplasma acidophilum</b>         | 157 | KGIRSYYTYSF-GI---GDQEFVWLYEIP---DIAAASRVTEKLRARARKW-IKETPILLGLR-VDAGDIAGFLD.                      | 224                                                     |     |
| <i>Sulfolobus acidocaldarius</i>        | 158 | QGIRSYYTYSF-GI---ADYEFVWLYEAP---DLSKWINVVERLREARARKW-VVSEEPILVGE---IGSLDIFLK.                     | 222                                                     |     |

**Supplemental Figure S5** Structure-based amino acid sequence alignment of lineage II Clds (first block of 15 sequences), lineage I Clds (next block of 12 sequences), and Cld-like proteins (remaining six sequences). Names printed in red represent proteins whose structures have been determined and which were used to define the shown alignment. Residues that are conserved in all Clds and Cld-like proteins are colored red. The signature residues, which are conserved only in lineage I and II Clds, are shown in green or cyan (the catalytically important arginine). The published lineage I Cld sequences from *D. chlorophilus*, *P. sp.* PK, *D. sp.* LT-1, *D. sp.* WD, and *P. chloritidismutans* are short due to the PCR primers that were used for *cld* gene amplification (1, 2). Therefore, the conservation of residue Glu167 and Arg127 (only *P. chloritidismutans*) (NwCld numbering) cannot be verified for these enzymes. Residues marked in yellow are conserved in most lineage II Clds and are involved in the formation of salt bridges at the dimer interface. Note that one of these residues (Asp134) lacks a homolog in lineage I Clds and the other Cld-like proteins, and probably is vital for dimer formation in lineage II Clds. Please refer to Fig. 2 in the main text for sequence accession numbers.

## References

1. **Bender, K. S., M. R. Rice, W. H. Fugate, J. D. Coates, and L. A. Achenbach.** 2004. Metabolic primers for detection of (Per)chlorate-reducing bacteria in the environment and phylogenetic analysis of *cld* gene sequences. *Appl. Environ. Microbiol.* **70**:5651-5658.
2. **Cladera, A. M., E. Garcia-Valdes, and J. Lalucat.** 2006. Genotype versus phenotype in the circumscription of bacterial species: the case of *Pseudomonas stutzeri* and *Pseudomonas chloritidismutans*. *Arch. Microbiol.* **184**:353-361.
